# Supplementary material for: ReadDepth: A Parallel R Package for Detecting Copy Number Alterations from Short Sequencing Reads
Source: PLoS One. 2011 Jan 31;6(1):e16327. doi: 10.1371/journal.pone.0016327 (PMC3031566; doi:10.1371/journal.pone.0016327)
Supplement: Dataset S1 — MCF-7 copy number results. Segmented copy number calls for the MCF-7 cell line. (DAT) [file pone.0016327.s003.dat]

chr1	16748601	17077500	9	5.57201831489375
chr1	43237701	43313600	2	5.03712313908283
chr1	85741701	85792300	2	3.92420388548016
chr1	85792301	96241200	413	1.35594625858379
chr1	106538301	106867200	13	7.21000370088664
chr1	106867201	107246700	15	10.9041091229780
chr1	107246701	107423800	7	7.46478133357598
chr1	107423801	107727400	12	10.9715845946200
chr1	107727401	108284000	22	3.68381343840352
chr1	108284001	108764700	14	5.37140684765084
chr1	108764701	109321300	20	2.93324992519543
chr1	109321301	110662200	50	3.93509918603096
chr1	110662201	110991100	13	3.16498793482335
chr1	110991101	111244100	10	2.87149092048616
chr1	112154901	112382600	9	12.9098470210195
chr1	113850001	114178900	13	3.71175117595498
chr1	114178901	114305400	5	10.5137104259206
chr1	114305401	114710200	16	15.2792306865582
chr1	114710201	114811400	4	8.44091853168992
chr1	114811401	115039100	9	11.2378956176520
chr1	115039101	115165600	5	7.86910740652122
chr1	115165601	116557100	47	4.47721003630855
chr1	116557101	116987200	17	6.08728958733865
chr1	116987201	117695600	28	4.46574229553402
chr1	117695601	117872700	7	2.52888248893059
chr1	117872701	118201600	13	4.1661073082934
chr1	119188301	119314800	5	2.55141928092254
chr1	119517201	119947300	17	2.73416441515114
chr1	120048501	147321900	138	5.21620294103424
chr1	147321901	147473700	6	0.483470577634114
chr1	147473701	150712100	116	4.21695024607862
chr1	150863901	153216800	93	2.54100638398421
chr1	154203501	156050400	73	2.5877531448747
chr1	156354001	156682900	13	2.77386966160553
chr1	164804201	165360800	22	2.92796843355088
chr1	166600501	167359500	30	3.09105644687269
chr1	167359501	169206400	73	2.5602771670082
chr1	169206401	171812300	103	2.82411727584568
chr1	171812301	173355600	61	2.5533653827316
chr1	173355601	174139900	31	3.45838863415679
chr1	174747101	176341000	63	3.25261485117324
chr1	177175901	179124000	77	2.81551726958579
chr1	179124001	179883000	30	4.97087560284273
chr1	179883001	179984200	4	2.85798827948219
chr1	180642001	184993600	172	2.83883697058094
chr1	193696801	195973800	90	2.56791954079271
chr1	195973801	197896600	76	2.95160568550219
chr1	197896601	198377300	15	3.42095707079069
chr1	198377301	198630300	10	4.16812920664359
chr1	198630301	199111000	19	3.33110308352220
chr1	199111001	199996500	35	5.60144870404642
chr1	199996501	200249500	10	1.36821978762956
chr1	200249501	205334800	191	4.95642534365902
chr1	205334801	205967300	23	3.54331567182443
chr1	212874201	213936800	42	3.42570281302537
chr1	213936801	214999400	42	3.01425192610648
chr1	214999401	217833000	112	3.51713326487674
chr2	11511501	12751200	49	2.78620227557901
chr2	17836501	18038900	8	2.78794094126729
chr2	19126801	19658100	21	2.74346657718120
chr2	19658101	19961700	12	3.21919506808389
chr2	19961701	21150800	47	2.56418437292618
chr2	21327901	21530300	8	2.80655435406103
chr2	22947101	23807300	34	2.74574947782878
chr2	24844601	25578300	29	2.52520410241542
chr2	26539701	26818000	11	2.89006111267571
chr2	28234801	28791400	22	2.84454913208454
chr2	28993801	31625000	104	2.73378540575156
chr2	36457301	36938000	19	2.61208166048702
chr2	37444001	38380100	37	2.71527816197759
chr2	45691801	46602600	36	2.98348805338293
chr2	47032701	47184500	6	3.38815529113611
chr2	80049201	80352800	12	2.53291734620293
chr2	90447501	93192550	24	6.63041880558638
chr2	117948601	122806200	192	2.54717838758209
chr2	126525301	127790300	50	2.57451379403771
chr2	131281701	131560000	11	2.69521432223043
chr2	132496101	132723800	9	2.90593009914274
chr2	132723801	132774400	2	69.1089186347814
chr2	132774401	133128600	14	2.95570031734701
chr2	133811701	135355000	61	2.73719838259783
chr2	136493501	137075400	23	2.72470492488932
chr2	139074101	139225900	6	2.8258796015211
chr2	143324501	143425700	4	2.64983035548069
chr2	161818801	161869400	2	7.9601741836089
chr2	172773701	174620600	73	2.52835667727206
chr2	205967301	206549200	23	2.68980204113401
chr2	216239101	218769100	100	2.88265862956816
chr2	220185901	220742500	22	2.8575921056399
chr2	230483001	230558900	3	1.13815733130220
chr2	237971801	238199500	9	2.96308497432226
chr3	1	581900	22	2.61081457798116
chr3	581901	657800	3	4.96743124829394
chr3	657801	3036000	94	2.57683471163098
chr3	3036001	4326300	51	3.05972077290305
chr3	4326301	5793700	58	3.55266092314475
chr3	5793701	7311700	60	2.62242224967254
chr3	7311701	7640600	13	3.04998046013243
chr3	7640601	8298400	26	3.35450524629086
chr3	8298401	9386300	43	4.11217026282315
chr3	9386301	9664600	11	2.980181093358
chr3	9664601	9867000	8	4.24893124924625
chr3	9867001	10044100	7	3.65152725781248
chr3	10044101	10297100	10	3.02283032273909
chr3	10297101	10752500	18	4.53939490154329
chr3	10752501	10853700	4	3.60425228931888
chr3	10853701	11106700	10	4.50023393875524
chr3	11106701	12801800	67	3.62153169106797
chr3	12801801	13915000	44	4.30197756182951
chr3	13915001	14092100	7	3.19363624673221
chr3	14092101	15559500	58	4.27759530980969
chr3	15559501	15761900	8	3.6085018640018
chr3	15761901	15964300	8	2.86393748240229
chr3	15964301	16571500	24	4.18086077027361
chr3	16571501	17229300	26	3.33641789176667
chr3	17229301	17735300	20	2.5890090351884
chr3	17735301	18266600	21	3.11622628800351
chr3	18519601	19152100	25	2.74479803845565
chr3	19506301	20417100	36	2.85501831394017
chr3	20417101	22820600	95	2.55566723508623
chr3	22820601	23807300	39	2.91601875763316
chr3	24009701	24414500	16	3.04828966067954
chr3	24414501	28032400	143	2.55018162484736
chr3	31675601	32384000	28	2.68347044731573
chr3	33876701	34433300	22	2.67529873899380
chr3	37393401	37874100	19	2.90673590574814
chr3	40631801	41188400	22	2.6730744132594
chr3	61580201	62187400	24	13.0050496317491
chr3	62187401	62313900	5	6.95427443044235
chr3	62313901	63604200	51	10.5824370379197
chr3	63604201	63958400	14	14.0120875268671
chr3	63958401	64945100	39	25.8680607769770
chr3	71978501	72838700	34	2.86731419281036
chr3	75748201	75925300	7	7.64703247047966
chr3	100795201	103072200	90	2.61081457798116
chr3	103072201	103451700	15	3.16849996588857
chr3	103451701	103983000	21	2.68626195822220
chr3	108992401	109270700	11	3.05717682685470
chr3	112635601	115696900	121	2.63262128898190
chr3	118226901	118353400	5	1.28280332648216
chr3	119542501	120149700	24	2.59439832954727
chr3	120377401	122047200	61	2.83745989239964
chr3	122780901	122882100	4	3.20894708496383
chr3	123109801	124121800	40	2.72659420112347
chr3	124121801	126398800	90	3.33734307147982
chr3	126398801	127461400	42	2.73814718767449
chr3	127461401	130775700	131	3.19540766579659
chr3	130775701	134545400	149	2.67140738269367
chr3	134545401	134773100	9	3.42879107533978
chr3	134874301	135430900	22	3.28364917990445
chr3	135430901	135835700	16	2.79936576171424
chr3	135835701	137100700	50	3.35194853867179
chr3	137100701	140288500	126	2.66826138316005
chr3	140288501	142666700	94	3.21117212864063
chr3	142666701	143552200	35	2.69334678933432
chr3	144336501	145146100	32	2.89708095634787
chr3	149902501	151597600	67	3.21562684551617
chr3	151597601	151850600	10	2.62879200917497
chr3	151850601	152660200	32	3.4909023466978
chr3	152660201	156176900	139	2.69390691328955
chr3	156176901	159187600	119	3.13964186044569
chr3	159187601	159541800	14	2.66826138316005
chr3	159820101	160983900	46	2.74441755502505
chr3	160983901	161414000	17	3.22589616088994
chr3	161414001	162223600	32	2.52537914229216
chr3	162223601	162932000	28	3.47858361668534
chr3	162932001	170673800	306	2.57665610524957
chr3	170673801	171635200	38	2.90713889283997
chr3	171635201	172040000	16	3.80395452667056
chr3	172040001	173583300	61	3.15272645365399
chr3	173583301	174494100	36	2.63170905005802
chr3	184386401	190433100	239	2.91864754107668
chr3	194000401	199501827	211	3.09041374657956
chr4	1	50600	2	9.1622377519536
chr4	3542001	3617900	3	3.79868477951461
chr4	4933501	5110600	7	2.71226849135797
chr4	9057401	9108000	2	0.690350055844229
chr4	48778401	50865650	15	11.9042101898572
chr4	176239801	176619300	15	2.73037668450147
chr4	178491501	178719200	9	1.14726605804922
chr4	181704601	182008200	12	1.13492738983153
chr4	182008201	182261200	10	0.454893271359047
chr4	182261201	182463600	8	0.0143420990841270
chr4	182463601	190357200	312	0.593245024166426
chr4	190357201	190711400	14	1.12178795691875
chr4	190711401	190913800	8	7.22000581969944
chr5	9032101	9639300	24	2.96945876712015
chr5	9639301	11385000	69	3.30786418215336
chr5	11385001	11916300	21	2.81161683806909
chr5	12827101	13864400	26	2.82000945551389
chr5	13864401	14876400	40	3.30465576771338
chr5	14876401	16546200	66	2.82627137877208
chr5	16546201	16976300	17	3.31842806351525
chr5	16976301	17988300	38	2.7688751436427
chr5	167081201	169029300	77	2.79645671554653
chr5	169029301	170193100	46	3.58829872681668
chr5	170775001	171255700	19	3.39332591116707
chr5	171255701	171432800	7	2.65681910074691
chr5	171432801	171534000	4	3.56598343190382
chr5	171685801	172318300	25	3.71896198271722
chr5	172318301	172596600	11	2.70026313173655
chr5	172596601	173229100	25	3.82696312533576
chr5	173229101	173406200	7	2.59331957395131
chr5	173406201	173988100	23	3.82855504556358
chr5	173988101	175177200	47	3.22120393300292
chr5	175177201	175442850	7	4.10989062355285
chr5	175442851	177390950	70	2.90049674439437
chr5	177390951	177530100	5	5.45696957471614
chr5	177530101	180857866	119	2.93752269940808
chr6	227701	328900	4	5.24702622249652
chr6	11207901	13586100	94	2.56987822821865
chr6	14117401	15255900	45	2.70776023923786
chr6	15357101	17279900	76	2.59313982496591
chr6	39088501	39543900	18	2.89306753189097
chr6	39923401	41137800	48	2.94465782538961
chr6	41137801	42504000	54	2.5741569153797
chr6	43111201	44907500	71	2.66678219503219
chr6	45514701	46197800	27	2.68254058846996
chr6	46956801	47462800	20	2.62151354485388
chr6	151926501	152053000	5	4.90142076171918
chr6	155342001	158302100	99	1.35097408453564
chr6	158302101	160452600	85	1.06348523231555
chr6	160452601	163488600	119	1.28084863991525
chr6	163488601	163766900	11	0.987463960384324
chr6	163766901	165968000	87	1.32115524195641
chr6	165968001	169611200	133	0.96332866456081
chr6	169611201	169763000	6	1.36793530390249
chr7	2884201	3289000	16	3.32441386919870
chr7	3466101	4756400	51	2.99529894917789
chr7	4756401	6881600	80	2.57094723280546
chr7	6881601	7058700	7	3.51445260684959
chr7	7058701	8602000	61	2.62678841935610
chr7	22567601	22694100	5	2.72564939931308
chr7	31625001	32611700	39	3.97650228517622
chr7	32611701	33649000	41	3.28843236984635
chr7	33649001	34256200	24	4.4756586224069
chr7	34256201	35091100	33	3.65228665051242
chr7	35091101	35799500	28	2.55389639534496
chr7	36001901	37595800	63	2.56400664336903
chr7	44958101	45717100	30	2.72829566975871
chr7	45793001	48803700	118	2.53994982885739
chr7	50498801	51814400	52	2.6271525947956
chr7	57279201	61681400	44	3.1799410037959
chr7	90472801	91408900	37	2.83647667412605
chr7	91813701	92648600	33	2.86274665193095
chr7	94748501	97506200	109	2.67678265100602
chr7	97506201	100365100	113	3.15950817788335
chr7	100365101	100491600	5	6.69925190006741
chr7	100491601	101781900	50	3.68892382963543
chr7	101781901	104033600	81	3.20627906756549
chr7	104033601	104387800	14	3.95862662566083
chr7	104387801	105020300	25	3.03984971280303
chr7	105020301	105501000	19	4.52055529190013
chr7	105501001	106411800	36	3.70224404987418
chr7	106411801	107044300	25	2.86512880822909
chr7	107044301	108309300	50	3.3498581364589
chr7	108309301	111041700	108	2.66530382691303
chr7	111041701	112180200	45	3.25622411750719
chr7	112180201	113951200	70	2.56294052469207
chr7	127107201	127765000	26	2.86195304004583
chr7	130902201	132141900	49	2.94057849108323
chr7	133356301	134697200	53	2.65663495046225
chr7	135000801	135253800	10	2.83156569087421
chr7	136948901	137429600	19	2.66678219503219
chr7	138112701	138315100	8	2.83038832065331
chr7	138947601	139377700	17	3.04998046013243
chr7	140415001	140870400	18	3.02891270618711
chr7	147296601	148182100	35	2.62788109714840
chr7	148485701	157796100	361	2.54417868709787
chr7	157796101	158327400	21	4.03732576460173
chr7	158327401	158821424	15	2.64872855114642
chr8	2175801	2277000	4	3.14617735489062
chr8	3592601	3668500	3	2.63462932783751
chr8	7096651	7665900	2	2.90935632072446
chr8	7665901	8146600	2	0.770357490297056
chr8	12321101	12498200	4	4.71252411179502
chr8	29879301	37646400	307	1.36084240272511
chr8	37646401	38962000	52	1.02327931653677
chr8	39771601	41365500	63	1.35538245363618
chr8	41365501	43490700	84	1.00863206831990
chr8	43490701	43566600	3	0.345462255877187
chr8	43870201	46982100	4	9.97903285749054
chr8	80403401	83009300	103	2.75642815738221
chr8	86323601	86475400	6	2.94486194059056
chr8	86475401	87436800	32	4.51335419020532
chr8	87436801	88195800	30	3.91903919049332
chr8	88195801	90523400	92	3.4159811170193
chr8	90523401	91940200	56	4.12844933402984
chr8	91940201	94293100	93	3.24068770653218
chr8	94293101	94748500	18	4.30734833810946
chr8	94748501	94900300	6	3.32833350186591
chr8	94900301	95406300	20	4.74267168424642
chr8	95406301	95988200	23	3.58705533272016
chr8	95988201	96544800	22	4.91468857022907
chr8	96544801	97354400	32	3.92501998558659
chr8	97354401	97506200	6	4.99851655628312
chr8	97506201	98239900	29	3.72902895673169
chr8	98239901	98670000	17	4.85509659770675
chr8	98670001	98872400	8	3.49162833491345
chr8	98872401	99530200	26	4.73642979330836
chr8	99530201	101453000	76	3.42380372661556
chr8	101453001	103299900	73	5.36136367458563
chr8	103299901	103552900	10	3.83014762799010
chr8	103552901	104362500	32	5.40576951047524
chr8	104362501	105323900	38	3.49695686382014
chr8	105323901	105576900	10	5.35171021914445
chr8	105576901	105728700	6	3.71432485768461
chr8	105728701	105981700	10	4.93038395073068
chr8	105981701	111269400	209	3.52128012233263
chr8	111269401	112458500	47	2.87647114886785
chr8	117265501	118657000	55	2.80033611609667
chr8	118657001	119491900	33	3.2118399425444
chr8	119491901	121617100	84	2.84139617484106
chr8	121617101	121870100	10	4.77599060951838
chr8	121870101	122705000	33	3.93782773447056
chr8	122705001	123539900	33	3.49332289461809
chr8	123539901	124096500	22	6.17868575274069
chr8	124096501	124526600	17	4.15198145542583
chr8	124526601	125361500	33	6.20013659579346
chr8	125361501	125614500	10	4.15428444128173
chr8	125614501	126171100	22	6.69785897462787
chr8	126171101	126373500	8	4.49773917094247
chr8	126373501	126525300	6	6.11689707075905
chr8	126525301	126753000	9	7.88384820985957
chr8	126753001	126854200	4	6.3383178108858
chr8	126854201	127436100	23	4.56020916943212
chr8	127436101	127790300	14	5.86649985039087
chr8	127790301	127967400	7	3.78974295825797
chr8	127967401	128195100	9	2.86810929132874
chr8	128195101	128625200	17	5.49492579975107
chr8	128625201	128903500	11	6.6899711993125
chr8	128903501	129207100	12	7.94308807302093
chr8	129207101	129333600	5	6.6520545525047
chr8	129333601	129662500	13	5.3587629556945
chr8	129662501	129966100	12	4.07612981887923
chr8	129966101	131458800	59	3.05929663493733
chr8	131458801	132116600	26	3.607501513529
chr8	132116601	132825000	28	2.57255157351655
chr8	132825001	132900900	3	3.66369651073952
chr8	132900901	133103300	8	2.52905778378249
chr8	133103301	133837000	29	3.38721602523709
chr8	133938201	134950200	40	3.91388129282769
chr8	134950201	136518800	62	3.48654958624112
chr8	136518801	136695900	7	2.59026553501174
chr8	136695901	137151300	18	3.26209771924154
chr8	137151301	138897000	69	2.55903521410239
chr8	138897001	139225900	13	2.98783400791914
chr8	139225901	141477600	89	3.67335925824082
chr8	141477601	142084800	24	3.1331199420592
chr8	142084801	144058200	76	3.54970713147963
chr8	144058201	144235300	5	2.89728177365726
chr8	144235301	144361800	5	5.71241185923529
chr8	144361801	146274826	71	3.18258710469512
chr9	607201	1037300	17	3.40156816504904
chr9	1037301	1366200	13	2.56134217779548
chr9	21833901	21909800	3	0.512420464942919
chr9	21909801	21960400	2	0.0334650736588594
chr9	21960401	22061600	4	0.657106901620034
chr9	39872801	42668450	6	1.05533424423287
chr9	42668451	43591900	6	0.109750544312612
chr9	66134201	68550350	23	4.97294336183674
chr9	77342101	78151700	32	2.65774004365940
chr9	80175701	81744300	62	2.59296008843933
chr9	82908101	84982700	81	2.69783104395823
chr9	84982701	85412800	17	3.16564614399541
chr9	85969401	87310300	53	3.14269006667032
chr9	87791001	89688500	75	2.95918522024243
chr9	89764401	90143900	15	3.09062796516125
chr9	90143901	91257100	44	2.5336197173746
chr9	91257101	91699850	15	3.61501090700434
chr9	91699851	91839000	5	2.91036480153625
chr9	93357001	94571400	48	2.98224751356435
chr9	94925601	96013500	43	3.06056922524890
chr9	97329101	97809800	19	2.77175549776394
chr9	97809801	98113400	12	3.45910786063298
chr9	98113401	99808500	67	2.737008661039
chr9	99808501	99960300	6	3.57885973048691
chr9	99960301	100263900	12	4.51210299617293
chr9	100263901	100896400	25	3.46582785806016
chr9	100896401	101098800	8	2.72961976827690
chr9	101098801	101427700	13	3.60550164445931
chr9	101427701	101528900	4	2.66881629020930
chr9	101528901	103451700	76	2.60557178067554
chr9	106588901	108764700	86	2.69222689078684
chr9	108764701	109928500	46	3.43235791457679
chr9	109928501	110130900	8	2.89547491887976
chr9	110282701	110940500	26	2.81064257476375
chr9	110940501	112053700	44	3.3274108197896
chr9	112053701	114533100	98	2.69316010723098
chr9	114533101	117037800	98	3.44546809940091
chr9	117037801	117973900	37	2.67919576371198
chr9	117973901	119466600	59	3.1698179820341
chr9	120934001	121768900	33	3.06014496967086
chr9	121768901	122350800	23	3.77506111337378
chr9	122350801	123008600	26	2.83510074088995
chr9	123008601	124627800	64	3.45910786063298
chr9	124627801	125083200	18	2.87786716002164
chr9	125083201	125437400	14	4.44197107977938
chr9	125437401	126373500	37	3.39238521186649
chr9	126373501	127157800	31	2.65681910074691
chr9	127157801	127360200	8	3.27591971411814
chr9	127360201	127537300	7	2.64084568203
chr9	127739701	128372200	25	2.54965138461850
chr9	128372201	129156500	31	3.39215007779121
chr9	129156501	130952800	71	3.01738753623962
chr9	130952801	134039400	118	3.51274779743142
chr9	134596001	135253800	26	3.07950826461818
chr9	136265801	137480200	48	3.3117643019992
chr9	139504201	140273252	28	3.35659854842617
chr10	1	6299700	245	2.91480627167181
chr10	6299701	6906900	24	3.42665275120719
chr10	6906901	8096000	47	2.92310165139408
chr10	8146601	8804400	26	3.17707687712609
chr10	9209201	9335700	5	3.19762332140989
chr10	10600701	11587400	39	2.91076829173473
chr10	38810201	39113800	10	2.75013034854822
chr10	39113801	41745000	6	30.0751494213582
chr10	78354101	81238300	102	2.62224048351328
chr10	127562601	127613200	2	11.6721627539214
chr10	135279101	135374737	2	4.02893910449628
chr11	1	3213100	120	0.678443227359713
chr11	3213101	11663300	330	1.24867670760733
chr11	43617201	45767700	85	1.19772773920704
chr11	45767701	48449500	106	3.0520952783446
chr11	48753101	48930200	7	3.86964172752447
chr11	49891601	50271100	15	2.65332242710532
chr11	50600001	50890950	6	3.14421527939067
chr11	56343101	56950300	24	1.30739945419466
chr11	56950301	57329800	15	0.883866263999453
chr11	57329801	59227300	75	1.32298802211137
chr11	65046301	70131600	197	3.28160137176156
chr11	70131601	70814700	27	3.96851703963549
chr11	70814701	71143600	13	3.37175567701025
chr11	71143601	71472500	13	2.83883697058094
chr11	71472501	72180900	28	3.64798551240311
chr11	72180901	74356700	86	3.01404300132494
chr11	74356701	75216900	34	3.74742602670871
chr11	75216901	75495200	11	2.53309292073952
chr11	75495201	75824100	13	3.26571750824664
chr11	75975901	76203600	9	3.73316687630954
chr11	76203601	76456600	10	2.64964668960215
chr11	76456601	76608400	6	3.48171955090885
chr11	76608401	77544500	37	2.76618951373042
chr11	77544501	77671000	5	3.76878631892693
chr11	77671001	78025200	14	2.81220155814678
chr11	78025201	78784200	30	3.60675143266828
chr11	78784201	79442000	26	3.01947975492699
chr11	81896101	83262300	54	2.76120882433245
chr11	84755001	86247700	59	3.00049390651936
chr11	91130601	96038800	194	1.33450064243468
chr11	107145501	107423800	11	0.980439150783342
chr11	110586301	116658300	239	1.22790589601855
chr11	116658301	116886000	9	2.74689164042380
chr11	116886001	117619700	29	4.41526490924419
chr11	117619701	118505200	35	3.5125043207466
chr11	118732901	118884700	6	2.82901534078820
chr11	118884701	129333600	413	1.24418412188682
chr11	129333601	129864900	21	0.926588061890371
chr11	129864901	132900900	120	1.25814656886037
chr11	132900901	134452384	61	0.929933849883015
chr12	1	126500	4	2.88026189843688
chr12	8450201	8500800	2	0.0637381077763498
chr12	9436901	9639300	8	0.971038229250796
chr12	34711601	35445300	2	9.27726788182878
chr12	46046001	46830300	31	2.74270603217082
chr12	47943501	48247100	12	2.66530382691303
chr12	48247101	48829000	23	3.42214288963978
chr12	48829001	49866300	41	2.74974912595371
chr12	49866301	50726500	34	3.17972059472067
chr12	50726501	51485500	30	3.87904093360884
chr12	51485501	51612000	5	6.13345508994471
chr12	51612001	51763800	6	4.51272854982605
chr12	51763801	52598700	33	3.09470094069989
chr12	56368401	56596100	9	3.50350753732722
chr12	56722601	57102100	15	2.63609068168571
chr12	60517601	61301900	31	2.83097694455695
chr12	61301901	61605500	12	4.21081648027961
chr12	61605501	62086200	19	3.20850226127247
chr12	62086201	62415100	13	2.58327279343367
chr12	62415101	63528300	44	3.22500187653833
chr12	63528301	63831900	12	3.84610993384140
chr12	63831901	68841300	198	2.80538738359998
chr12	69069001	69246100	7	2.91359428986436
chr12	70612301	70840000	9	2.75833943010805
chr12	74103701	76102400	69	2.75451820899065
chr12	76102401	76431300	13	2.52800619690561
chr12	78252901	79138400	35	2.62624225084830
chr12	91307701	93913600	103	2.52660476120775
chr12	102465001	102566200	4	2.95570031734701
chr12	102566201	102743300	7	3.91062717142654
chr12	103299901	103730000	17	2.95672486254768
chr12	104084201	105045600	38	2.72093029879218
chr12	105551601	105678100	5	3.16301412833247
chr12	106057601	108891200	110	2.71452543137206
chr12	109726101	110232100	20	2.82764302693548
chr12	111522401	113546400	80	2.77367739827543
chr12	113748801	114937900	47	2.83097694455695
chr12	115216201	119264200	160	2.73909632163892
chr12	122047201	122199000	6	3.18611866469144
chr13	1	19708700	68	2.66419558868089
chr13	19708701	19885800	7	3.83174087289079
chr13	19885801	21353200	58	2.72564939931308
chr13	21353201	21631500	11	3.55339975503069
chr13	21631501	21732700	4	3.02639437491389
chr13	44983401	45944800	38	2.64395935722557
chr13	45944801	47007400	42	3.51396543403548
chr13	93534101	99403700	232	1.32887002182970
chr13	99403701	99454300	2	0.221334461567280
chr13	109574301	114142980	158	0.928903091920399
chr14	1	19025600	11	4.03173272035884
chr14	19025601	19885800	27	2.59637721373941
chr14	19885801	19987000	4	3.74405077452214
chr14	19987001	20265300	11	3.26368088297416
chr14	20265301	20644800	15	4.05893152026705
chr14	20644801	21758000	44	3.03038270039281
chr14	21758001	24667500	115	3.59701456192507
chr14	24667501	25957800	51	2.68031024163896
chr14	29120301	29828700	28	2.61715614291002
chr14	29828701	33168300	132	2.86334200526006
chr14	33168301	34003200	33	3.56227773164179
chr14	34003201	39215000	206	2.91763619018349
chr14	39215001	40682400	58	2.53678279865173
chr14	43946101	45135200	47	2.81181173125191
chr14	48753101	106368585	2277	3.28706503362026
chr15	18557551	19455700	24	2.97894192857948
chr15	20189401	32472550	400	1.27323612883495
chr15	32472551	32662300	6	0.491444362419494
chr15	38101801	38354800	10	1.21883260567677
chr15	38354801	39721000	54	0.994952805687712
chr15	39721001	43794300	158	1.18665454218079
chr15	47513401	47589300	3	2.92289904444917
chr15	47589301	47766400	7	4.11359567942659
chr15	47766401	48348300	23	5.16547134561027
chr15	48348301	49107300	30	4.02168475905711
chr15	49107301	49486800	15	5.8255731639494
chr15	49486801	49739800	10	3.34544934526739
chr15	49739801	50144600	16	3.93428099023162
chr15	50144601	50372300	9	5.12659169664077
chr15	50372301	50473500	4	4.0781080492862
chr15	50473501	50777100	12	3.27841843055007
chr15	50777101	51536100	30	4.19334055221252
chr15	51536101	52345700	32	3.15600611350241
chr15	53357701	53534800	7	1.27420729306194
chr15	54799801	60821200	238	1.3556643268
chr15	60821201	61074200	10	3.00986754538224
chr15	61074201	62263300	47	2.56880966812592
chr15	63958401	67348600	134	2.57576325901965
chr15	67348601	68436500	43	3.00299068542648
chr15	68436501	68664200	9	4.0795216587801
chr15	68664201	68740100	3	3.32602727625235
chr15	68740101	69094300	14	2.58954746046161
chr15	69094301	69220800	5	3.22120393300292
chr15	69220801	69878600	26	3.62278703583056
chr15	69878601	71750800	73	2.92148118898866
chr15	71750801	72029100	11	3.98339901237783
chr15	72029101	72256800	8	3.15775666020368
chr15	72256801	72535100	11	3.92202844800792
chr15	72535101	74407300	73	3.12011672071498
chr15	74407301	75545800	45	2.60466891477255
chr15	75545801	76532500	39	3.55364606646925
chr15	76532501	77013200	19	2.7476533460921
chr15	77013201	77949300	37	3.46078663747645
chr15	77949301	78227600	11	2.53098682930043
chr15	78227601	78505900	11	3.4233291195336
chr15	78505901	79062500	22	3.96521749239241
chr15	79062501	83110500	128	3.07289825614949
chr15	83110501	83490000	15	4.1450801551826
chr15	83490001	84173100	25	2.81532211956353
chr15	84173101	84426100	10	4.14335662323218
chr15	84426101	85969400	61	2.98224751356435
chr15	85969401	91434200	216	3.51372187295345
chr15	91434201	91788400	14	4.35900844885331
chr15	91788401	94647300	113	3.34104635654242
chr15	94723201	95229200	20	3.32026870104607
chr15	95229201	95988200	30	2.78639540709754
chr15	95988201	97911000	75	3.53448495282103
chr15	97911001	98265200	14	2.69148055046485
chr15	98265201	100338915	79	3.53056725640711
chr16	1	354200	14	2.75757476203884
chr16	3314301	4351600	41	2.88086089433782
chr16	4807001	5009400	8	3.35334286480104
chr16	5135901	5945500	32	3.61977493915643
chr16	5945501	8247800	91	2.95733976012830
chr16	8247801	8652600	16	3.67692563843766
chr16	8652601	9234500	23	2.83215455963055
chr16	9234501	10297100	42	3.56746679115537
chr16	10297101	10524800	9	2.83254720683574
chr16	10524801	11562100	41	4.0848978451451
chr16	11562101	11789800	9	3.32625782688544
chr16	11966901	12144000	7	3.08763025580985
chr16	12144001	12624700	19	3.9141525918084
chr16	12624701	15078800	88	3.19098095923613
chr16	16116101	18646100	69	3.18346962754451
chr16	19000301	19531600	21	3.45407641462283
chr16	19531601	19759300	9	2.77021893622185
chr16	19759301	20315900	22	3.59776261784992
chr16	20315901	21201400	35	2.93203027448293
chr16	21353201	22428450	32	3.00653134578137
chr16	22428451	22618200	5	6.05194971329541
chr16	22618201	24439800	72	3.4278405443708
chr16	24692801	25097600	16	3.67718051233476
chr16	25097601	26413200	52	3.01195454980224
chr16	26413201	28740800	81	3.46438676046388
chr16	29575701	29803400	5	3.82961669358663
chr16	29803401	30056400	10	4.85206877536564
chr16	30056401	30486500	12	3.52738732576483
chr16	30486501	32510500	71	2.74441755502505
chr16	32510501	33750200	21	3.46246622906516
chr16	33750201	34053800	8	14.6669806221908
chr16	35091101	45008700	4	8.07633078037509
chr16	65729401	67424500	67	3.1735553392346
chr16	67424501	68411200	39	2.65111637315319
chr16	68411201	69397900	37	3.13898905815019
chr16	69397901	69777400	15	7.54907563010692
chr16	69777401	70156900	15	4.01806248601424
chr16	70156901	70435200	11	2.96657858405860
chr16	70435201	70966500	21	3.77977406419504
chr16	70966501	71371300	16	2.78485072971635
chr16	71371301	74356700	117	3.71458232398789
chr16	74356701	74862700	20	2.95529059867889
chr16	74862701	74989200	5	3.59576814767367
chr16	74989201	75596400	24	3.02912266169378
chr16	75596401	76026500	17	3.62454524957514
chr16	76026501	80023900	158	4.37869208113915
chr16	80023901	80555200	21	5.53583138182645
chr16	80555201	82022600	58	4.66539747915387
chr16	82022601	83996000	78	5.11807042820477
chr16	83996001	84299600	12	3.88900206278661
chr16	84299601	85083900	31	4.92048320790866
chr16	85083901	85159800	3	3.46726955511673
chr16	85159801	85918800	30	5.06197365860085
chr16	85918801	86829600	36	4.10704285153132
chr16	86829601	87006700	7	5.68239846218389
chr16	87006701	88827254	67	4.04012519566926
chr17	22162801	22314600	2	43.5228160207808
chr17	25224101	25983100	30	1.29549190434100
chr17	25983101	26362600	15	0.748357741793244
chr17	26362601	33674300	262	1.15324576940861
chr17	33674301	35167000	59	0.805915228706997
chr17	35167001	35293500	5	1.37697274129058
chr17	35293501	35799500	20	0.96252772345168
chr17	42301601	43085900	31	2.86910347453202
chr17	43085901	43490700	16	5.14760017238428
chr17	43490701	43971400	19	3.71406740922692
chr17	44173801	44275000	4	3.22500187653833
chr17	44275001	45211100	37	4.27611306511368
chr17	45211101	46299000	43	3.11838704024217
chr17	46299001	46729100	17	3.69045832899457
chr17	46729101	47260400	21	5.0336328811518
chr17	47260401	47386900	5	3.94930831320191
chr17	47386901	48120600	29	3.17377532095207
chr17	48120601	49613300	59	2.84968015136107
chr17	49613301	50701200	43	3.20627906756549
chr17	50701201	51940900	49	4.25335124870441
chr17	51940901	52699900	30	5.39304473136802
chr17	52699901	53813100	44	6.91581846584182
chr17	53813101	53990200	7	5.23322395433912
chr17	53990201	54142000	6	23.8794880164942
chr17	54142001	54395000	10	15.5140128864951
chr17	54395001	54546800	6	23.1012658151366
chr17	54546801	54749200	8	6.45447610481263
chr17	54749201	54901000	6	9.59178951378496
chr17	54901001	55255200	14	6.13132976470544
chr17	55255201	56241900	39	26.7654499374589
chr17	56241901	56646700	16	6.0418903422513
chr17	56646701	56722600	3	37.3853206026294
chr17	56722601	56950300	9	55.541721936451
chr17	56950301	57355100	16	29.2588264482222
chr17	57355101	58468300	44	7.89314361957766
chr17	58468301	58822500	14	4.48062504011304
chr17	58822501	59733300	36	6.88329814222642
chr17	59733301	59783900	2	30.4611815905299
chr17	59783901	60542900	29	5.32765255669594
chr17	60542901	61099500	22	7.08663134364886
chr17	61099501	61150100	2	5.93110124882
chr17	61150101	61630800	19	4.34061660848327
chr17	61630801	61858500	9	5.60494415976107
chr17	61858501	62288600	17	7.0362171129542
chr17	62288601	62491000	8	8.10324634338467
chr17	62491001	62845200	14	4.77963350899583
chr17	62845201	63123500	11	6.17226498330916
chr17	63123501	63806600	18	5.05776497786118
chr17	63806601	64363200	22	6.07169785533569
chr17	64363201	64616200	10	4.28768820874502
chr17	64616201	65046300	17	3.3645183742774
chr17	65046301	67576300	100	2.75089295230157
chr17	67576301	67804000	9	4.97742645754419
chr17	67804001	70460500	105	2.76235741762607
chr17	70713501	70789400	3	2.75948682980597
chr17	70789401	70966500	7	5.25977104082028
chr17	70966501	71320700	14	6.21648902952347
chr17	73066401	73268800	8	2.79955980568772
chr17	73268801	73471200	8	3.38205471521625
chr17	74963901	75318100	5	5.34244444252282
chr17	77367401	77519200	4	8.50729215752983
chr17	78505901	78774742	6	6.35811891830626
chr18	1	126500	5	14.4030255902926
chr18	16078151	16799200	2	69.6571721321162
chr19	1	961400	30	0.714348509828328
chr19	961401	2277000	52	0.249100530647136
chr19	2277001	3921500	65	0.541224855106888
chr19	4351601	9917600	216	0.778624691061662
chr19	9917601	10044100	5	2.79820178028310
chr19	13206601	13535500	13	2.71170454961689
chr19	17077501	17735300	26	0.70466037757101
chr20	6603301	6679200	3	3.27614679143931
chr20	7767101	13889700	242	2.72394958099244
chr20	14623401	15028200	16	2.78002912994179
chr20	15736601	15939000	8	2.7182911722803
chr20	15939001	18620800	106	3.10372341709942
chr20	18620801	19911100	51	3.57613202631932
chr20	19911101	21024300	44	3.16762159293536
chr20	21024301	22289300	50	2.7394760673388
chr20	22289301	28184200	157	3.24833404311479
chr20	28184201	29297400	5	10.0896204552994
chr20	29297401	30309400	40	3.13029798643957
chr20	35647701	36179000	21	2.7507022815404
chr20	38936701	40328200	55	6.3137625310288
chr20	40328201	40429400	4	3.24518336906172
chr20	40429401	40733000	12	5.58245609670741
chr20	41770301	44224400	97	2.57166014956246
chr20	44224401	44958100	29	3.41763896355893
chr20	44958101	45211100	10	5.52816240695422
chr20	45211101	45970100	30	38.4790159647417
chr20	45970101	46982100	40	23.1140794293102
chr20	46982101	47336300	14	3.25622411750719
chr20	47336301	47715800	15	4.64056349574891
chr20	47715801	47918200	8	3.33873132210275
chr20	47918201	48247100	13	6.8571068357796
chr20	48247101	48525400	11	9.06244289992099
chr20	48525401	48702500	7	7.3589503451524
chr20	48702501	48879600	7	33.1744352326311
chr20	48879601	49233800	14	6.11181129421722
chr20	49233801	49613300	15	7.89095547883413
chr20	49613301	49891600	11	10.0470496066797
chr20	49891601	49967500	3	8.5617161139065
chr20	49967501	50068700	4	6.84760745323112
chr20	50068701	50119300	2	4.74431565386132
chr20	50119301	50321700	8	2.90291031339907
chr20	50321701	51409600	43	3.55216845390044
chr20	51409601	51612000	8	4.93859273287349
chr20	51612001	51687900	3	48.4458103507384
chr20	51687901	52016800	13	62.2283461953718
chr20	52016801	52244500	9	42.9712547812067
chr20	52244501	52978200	29	25.7018446170168
chr20	52978201	54091400	44	5.00822715790391
chr20	54091401	54369700	11	6.90240917830632
chr20	54369701	54648000	11	5.85999730030708
chr20	54648001	54951600	12	7.32536171836498
chr20	54951601	55103400	6	10.346708609435
chr20	55103401	55305800	8	70.165989545157
chr20	55305801	56849100	61	9.8123588772892
chr20	56849101	57861100	40	6.3471106784692
chr20	57861101	57962300	4	3.15819444857334
chr20	57962301	58518900	22	6.87376247597327
chr20	58518901	59050200	21	5.14403336414249
chr20	59050201	59530900	19	6.16927090808549
chr20	59530901	62435964	109	4.35085820488814
chr21	1	13307800	22	9.27276761523565
chr21	14269201	14370400	4	1.09096135640329
chr21	17710001	17836500	5	1.33468565633012
chr21	38278901	39468000	47	4.09794323450672
chr21	39468001	39670400	8	2.95078744007672
chr21	39670401	43161800	138	4.20236070655923
chr21	43161801	43465400	12	2.89507354864599
chr21	43465401	43541300	3	6.76035965148351
chr21	43541301	46944323	134	3.05421156294520
chr22	30537101	30587700	2	2.69614857421884
chr22	33775501	35723600	77	1.13217737594655
chr22	35723601	38456000	108	0.807257027358814
chr22	38456001	39721000	50	1.17064204433635
chr22	39721001	40049900	13	0.737339014091123
chr22	40049901	40555900	20	1.18205732328987
chr22	40555901	45995400	213	0.830239800825795
chr22	45995401	47184500	47	1.13618676279975
chr22	47184501	49691432	94	0.65058073182921
chrX	23604901	24085600	19	0.960062344715518
chrX	39316201	39822200	20	1.08042580286838
chrX	39822201	39923400	4	0.263979902019985
chrX	39923401	40986000	42	1.19523972213008
chrX	40986001	41264300	11	0.860949188338904
chrX	44224401	44629200	16	0.902250535814082
chrX	44629201	46779700	85	1.32923851391478
chrX	46779701	47412200	25	0.979080915191884
chrX	47412201	47842300	17	1.31987380676974
chrX	47842301	49031400	45	0.983024991593748
chrX	49031401	54622700	179	1.23816192462985
chrX	58569501	61807900	8	4.81287848912042
chrX	64515001	64843900	13	1.09908274164701
chrX	67500401	71472500	152	1.15460549776042
chrX	72939901	75368700	96	1.28565183323808
